# Supplementary material for: The surprisingly high ligation energy of CO to ruthenium porphyrins
Source: Royal Society of Chemistry journal article supplement (doi:10.1039/c8cp01190g), 2018-01-01
Supplement: c8cp01190g1.pdf [file c8cp01190g1.pdf]

## Supplementary material

### The surprisingly high ligation energy of CO to Ruthenium porphyrins

Niloufar Shafizadeh, Séverine Boyé-Péronne and Satchin Soorkia.

*Institut des Sciences Moléculaires d'Orsay (ISMO), CNRS, Université Paris-Saclay, Université Paris-Sud, Orsay F-91405, France.*

Barbara K. Cunha de Miranda, Gustavo A. Garcia and Laurent Nahon.

*Synchrotron SOLEIL, L'orme des Merisiers, Saint-Aubin - BP 48 - 91192 Gif-sur-Yvette Cedex, France.*

Shufeng Chen<sup>1</sup>, Aurélien de la Lande.

*Laboratoire de Chimie Physique, CNRS, Université Paris-Sud, Université Paris Saclay, Orsay F-91405, France.*

*1-present address School of Chemical and Environmental Engineering, Shanghai Institute of Technology, Shanghai 201418, People's Republic of China*

Lionel Poisson and Benoît Soep.

*LIDYL, CEA, CNRS, Université Paris-Saclay, CEA Saclay 91191 Gif-sur-Yvette France.*

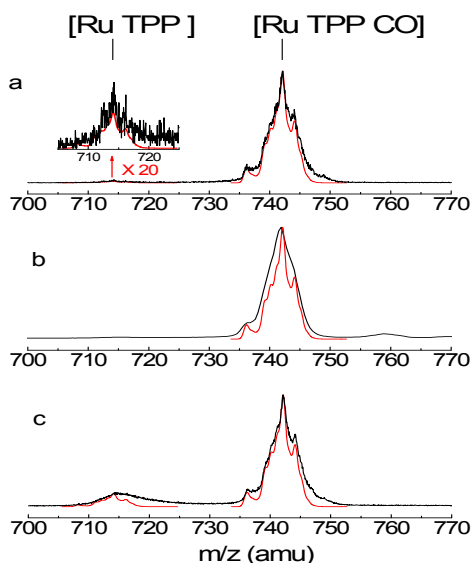

**Figure 1** Simulation of the contours of the TOF peaks in red of (a) [RuTP-CO] heated at 510°C and ionized at  $h\nu=7\text{eV}$ , (b) [RuTP-CO] heated at 380°C ionized at  $h\nu=7\text{eV}$  and (c) [RuTP-CO] heated at 380°C ionized at  $h\nu=10\text{eV}$ , respectively. This simulation is obtained with the isotopic distributions of carbon, hydrogen, oxygen and ruthenium convoluted with the mass resolution of  $m/\Delta m = 600$ . In black the experimental traces

**Table1-** Configuration of the triplet states of [RuTPP]

| State | Transition                                                                          |                                                                                     |                                                                                     |                                                                                      |
|-------|-------------------------------------------------------------------------------------|-------------------------------------------------------------------------------------|-------------------------------------------------------------------------------------|--------------------------------------------------------------------------------------|
|       | At $S_0$ minimum                                                                    |                                                                                     | At 5 Å                                                                              |                                                                                      |
|       | from                                                                                | to                                                                                  |                                                                                     |                                                                                      |
| $T_1$ | 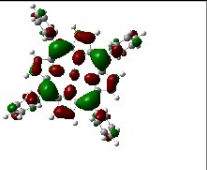   |    |                                                                                     |                                                                                      |
|       | $\pi \rightarrow \pi^*$                                                             |                                                                                     |                                                                                     |                                                                                      |
| $T_2$ |    |    |                                                                                     |                                                                                      |
|       | $\pi \rightarrow \pi^*$                                                             |                                                                                     |                                                                                     |                                                                                      |
| $T_3$ |   |   |   |   |
|       | $\pi \rightarrow dz^2, \pi^*$                                                       |                                                                                     | $\pi, dyz \rightarrow dxy$                                                          |                                                                                      |
| $T_4$ |  |  |  |  |
|       | $\pi, dyz \rightarrow dz^2, \pi^*$                                                  |                                                                                     | $dxy \rightarrow dyz, \pi^*$                                                        |                                                                                      |
| $T_5$ |  |  |  |  |
|       | $\pi, dxz \rightarrow dz^2, \pi^*$                                                  |                                                                                     | $\pi, dyz \rightarrow dyz, \pi^*$                                                   |                                                                                      |
| $T_m$ |                                                                                     |                                                                                     |  |  |
|       |                                                                                     |                                                                                     | $dxy \rightarrow dz^2$                                                              |                                                                                      |

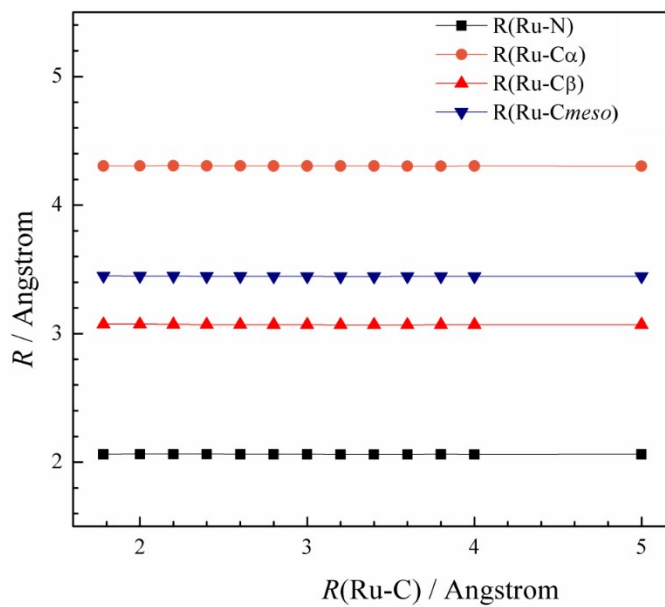

**Figure 2.** Evolution of the distances and internal angles between Ru and N, C $\alpha$ , C $\beta$ , and C meso as a function of the Ru-C coordinate.
